# Supplementary material
Source: Royal Society of Chemistry journal article supplement (doi:10.1039/d6nj00775a)
Supplement: d6nj00775a1.pdf [file d6nj00775a1.pdf]

**Rapid visible-light degradation of malachite green enabled by  
nanorod cobalt hydroxycarbonate: performance and mechanisms**

Jing Guo\*, Rui Wu, Qi Wang, Xiaomei Zhao, Jinlei Yang, Jinping Sha

Ningxia Key Laboratory of Green Catalytic Materials and Technology, College of Chemistry and  
Chemical Engineering, Ningxia Normal University, Guyuan 756099, China

Address correspondence to E-mail: [guojingsn@163.com](mailto:guojingsn@163.com)

## 1 Experiment

### 1.1 Materials

Cobalt(II) chloride hexahydrate ( $\text{CoCl}_2 \cdot 6\text{H}_2\text{O}$ ), Cobalt(II) nitrate hexahydrate ( $\text{Co}(\text{NO}_3)_2 \cdot 6\text{H}_2\text{O}$ ), Urea ( $\text{CO}(\text{NH}_2)_2$ ), and Malachite Green (MG) were bought from Aladdin Reagent Biochemical Technology Co., Ltd (Shanghai, China). Ethylene glycol (EG), and ethanol ( $\text{C}_2\text{H}_5\text{OH}$ ) were bought from Sinopharm Chemical Reagent Co., Ltd (Shanghai, China). Tert-butyl alcohol (TBA,  $\text{C}_4\text{H}_{10}\text{O}$ ), ascorbic acid (VC,  $\text{C}_6\text{H}_8\text{O}_6$ ), peroxymonosulfate (PMS,  $\text{KHSO}_5 \cdot 0.5\text{KHSO}_4 \cdot 0.5\text{K}_2\text{SO}_4$ ), ethylenediaminetetraacetic acid (EDTA-2Na,  $\text{C}_{10}\text{H}_{14}\text{N}_2\text{Na}_2\text{O}_8$ ), and L-histidine (L-His,  $\text{C}_6\text{H}_9\text{N}_3\text{O}_2$ ) were from Maclin Biochemical Technology Co., Ltd (Shanghai, China). Additionally, sodium nitrate ( $\text{NaNO}_3$ ), sodium sulfate ( $\text{Na}_2\text{SO}_4$ ), sodium dihydrogen phosphate ( $\text{NaH}_2\text{PO}_4$ ), disodium hydrogen phosphate ( $\text{Na}_2\text{HPO}_4$ ), sodium oxalate ( $\text{Na}_2\text{C}_2\text{O}_4$ ), methanol (MeOH,  $\text{CH}_4\text{O}$ ) was provided by Lianlong Bohua Tianjin Pharmaceutical Chemical Co., Ltd. All the obtained reagents were of pure analytical grade and were used for direct use without additional purification. Deionized water was RO water from a laboratory water purification system.

### 1.2 Characterization

Crystal structure of the samples was characterized by X-ray diffraction (XRD, Rigaku D/MAX 2500V, Japan) using Cu  $\text{K}\alpha$  radiation ( $\lambda = 1.5406 \text{ \AA}$ ) operated at 40 kV and 50 mA, with data collected in the  $2\theta$  range of  $5\text{--}90^\circ$  at a step size of  $0.02^\circ$  and a scanning speed of  $2^\circ/\text{min}$ . Morphological and structural features were examined by field emission scanning electron microscopy (FE-SEM, ZEISS Sigma 300, Germany) and transmission electron microscopy (TEM, JEOL JEM-F200, Japan); chemical composition and elemental valence states were analyzed by X-ray photoelectron spectroscopy (XPS, Thermo Scientific K-Alpha, USA). Fourier transform infrared (FT-IR) spectra were recorded on a Nicolet 6700 spectrometer to identify functional groups and chemical bonds. The concentration of MG during the photocatalytic process was monitored using a UV-Vis spectrophotometer (P4, MAPADA, Shanghai). Specific surface area was determined by nitrogen adsorption-desorption measurements at 77 K on a Micromeritics 3020 analyzer, and the Bruner-Emmett-Teller (BET) method was

applied for calculation. The leaching of cobalt ions from the solution was analyzed using inductively coupled plasma-optical emission spectrometer (ICP-OES, Agilent 5110).

### 1.3 Analytical methods

Degradation intermediates were analyzed using the chromatographic column Waters BEH C18 (2.1 × 100 mm, 1.7 μm) in combination with a high-performance liquid chromatography-mass spectroscopy (HPLC-MS) system. A formic acid aqueous solution (0.1%) was used as the mobile phase A, and an acetonitrile solution was used as the mobile phase B; the flow rate was set at 0.3 mL·min<sup>-1</sup>. The injection volume of the liquid was 5 μL, and the scanning range was controlled from 50 to 1000 m/z. The sheath gas temperature and flow were set at 350°C and 12 L·min<sup>-1</sup>, respectively.

### 1.4 Measurement of photocatalytic activity

The photocatalytic performance of the synthesized samples was evaluated by Malachite Green (MG, 50 mL, 50 mg·L<sup>-1</sup>) under visible-light irradiation ( $\lambda > 420$  nm) from a 300 W xenon lamp. Prior to irradiation, the suspension was magnetically stirred in the dark for 30 min to establish adsorption–desorption equilibrium. During the irradiation process, approximately 3 mL of the suspension was sampled at regular intervals and immediately filtered through a 0.22 μm polytetrafluoroethylene membrane. Concentration of MG in the filtrate was determined by UV–Vis spectroscopy. Degradation efficiency ( $R$ ) was calculated using the following equation:  $R (\%) = ((C_0 - C_t) / C_0) \times 100\%$ , where  $C_0$  denotes the concentration of pollutants in the initial sample, and  $C_t$  represents the concentration in the sample after photodegradation, measured at a given sampling<sup>1-3</sup>.

## 2 Results and Discussions

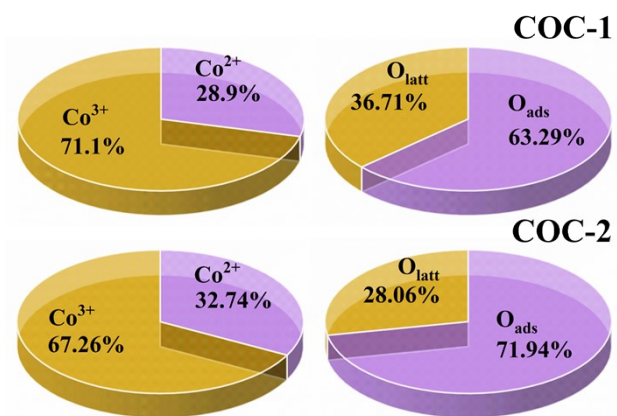

**Fig. S1** Fractions of Co and O species in COC-1 and COC-2.

**Table S1**  $S_{\text{BET}}$ , pore volume and pore size of the prepared samples

| Samples | $S_{\text{BET}}$ ( $\text{m}^2 \cdot \text{g}^{-1}$ ) | $V_p$ ( $\text{cm}^3 \cdot \text{g}^{-1}$ ) | Pore Diameter (nm) |
|---------|-------------------------------------------------------|---------------------------------------------|--------------------|
| COC-1   | 32.4                                                  | 0.089                                       | 12.191             |
| COC-2   | 3.3                                                   | 0.013                                       | 15.478             |

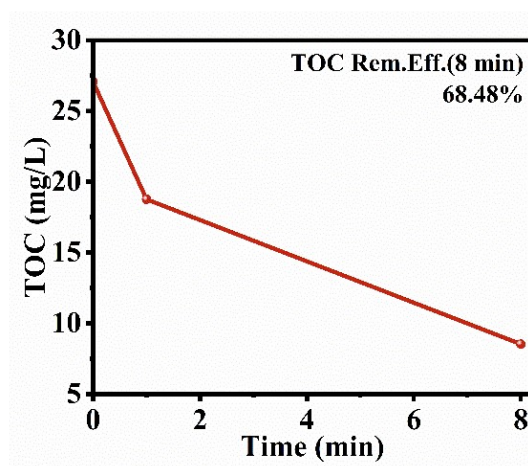

**Fig. S2** mineralization rate measured at 8 min.

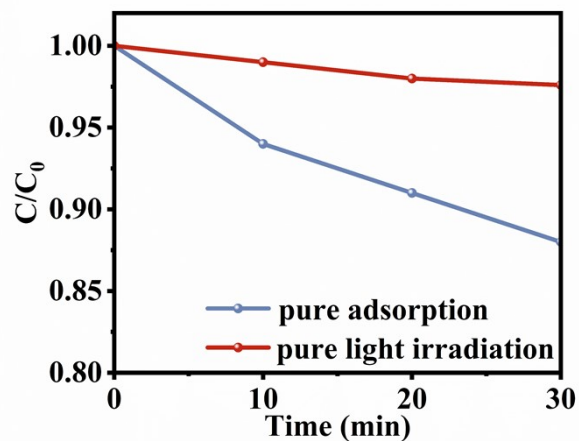

Fig. S3 Pure adsorption and pure light irradiation for 30 min.

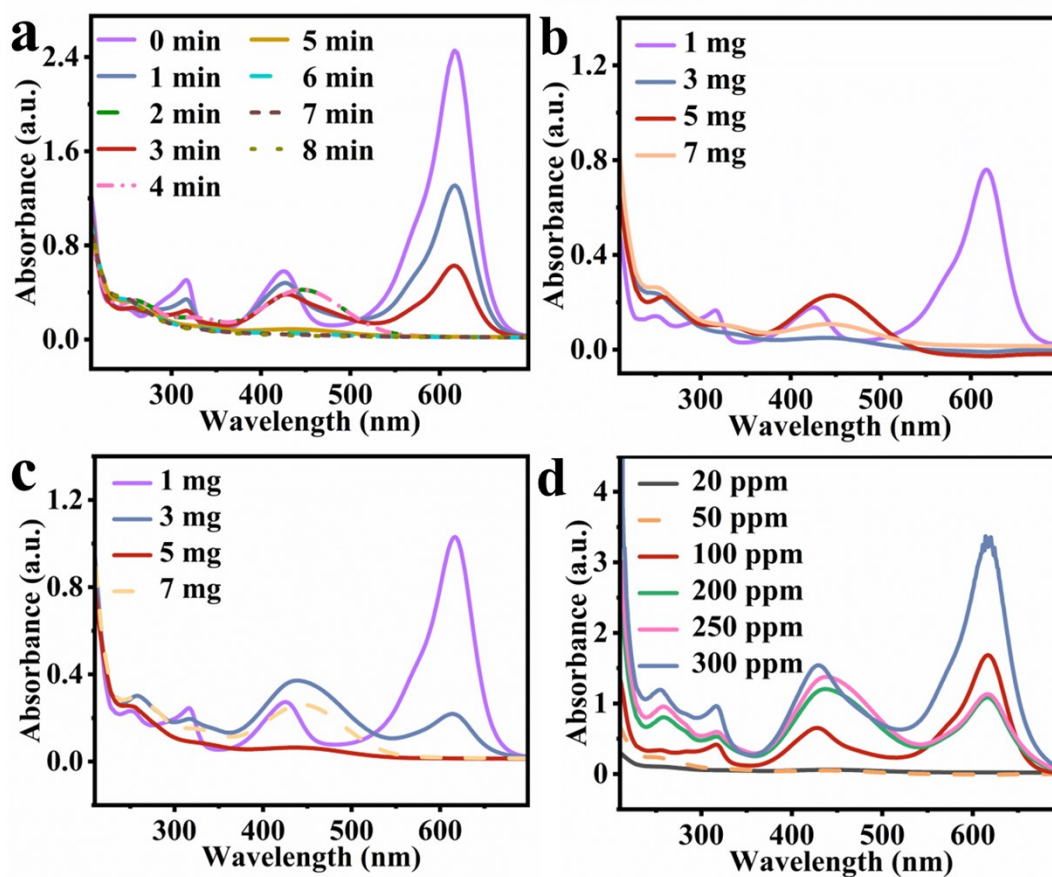

Fig. S4 UV-Vis absorption spectra of MG solutions under different reaction conditions: **a** COC-2, **b** Cat. dosage, **c** PMS dosage and **d** MG concentration.

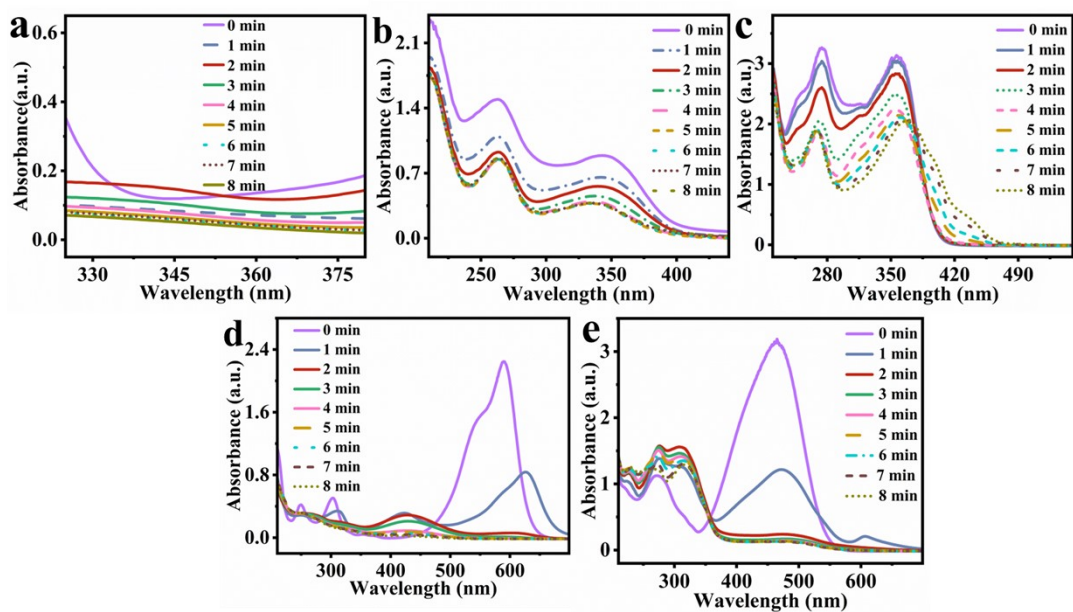

**Fig. S5** UV-Vis absorption spectra for **a** MG (320-380 nm); **b** OTC, **c** TC-HCl, **d** CV, and **e** MO degradation under light irradiation.

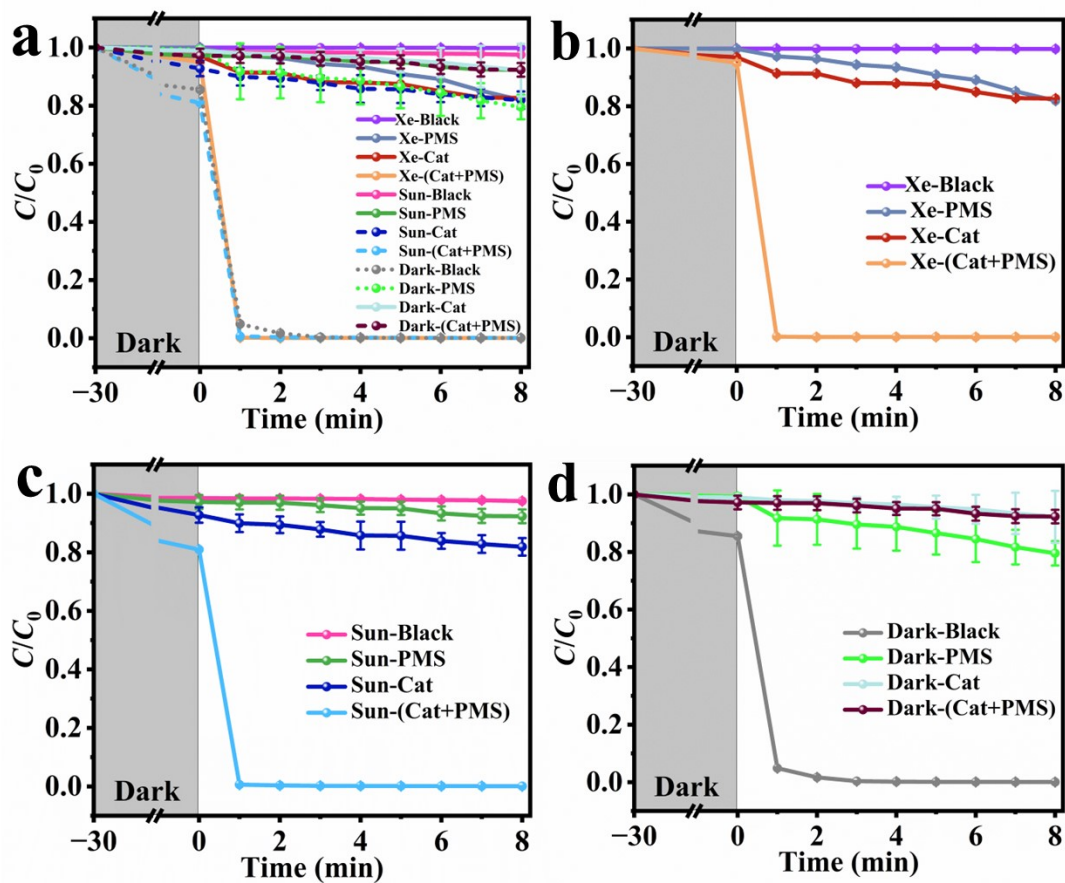

**Fig. S6** Effect of light source on MG degradation activity: **a** different light sources (comparison), **b** visible light, **c** sunlight, and **d** dark condition.

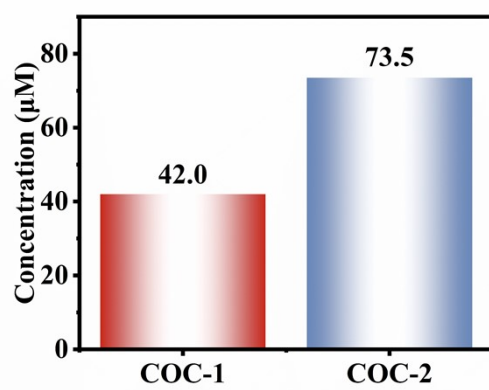

**Fig. S7** Metal ion leaching of COC-1 and COC-2.

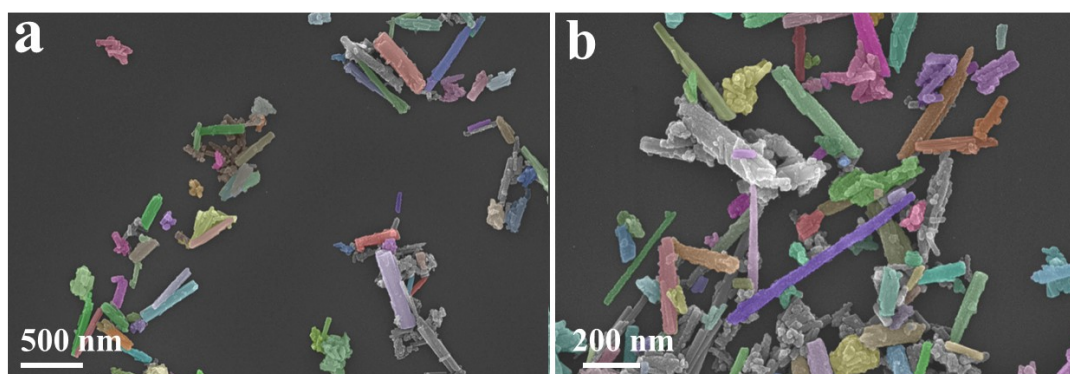

**Fig. S8** SEM images of COC-1 after five cycles.

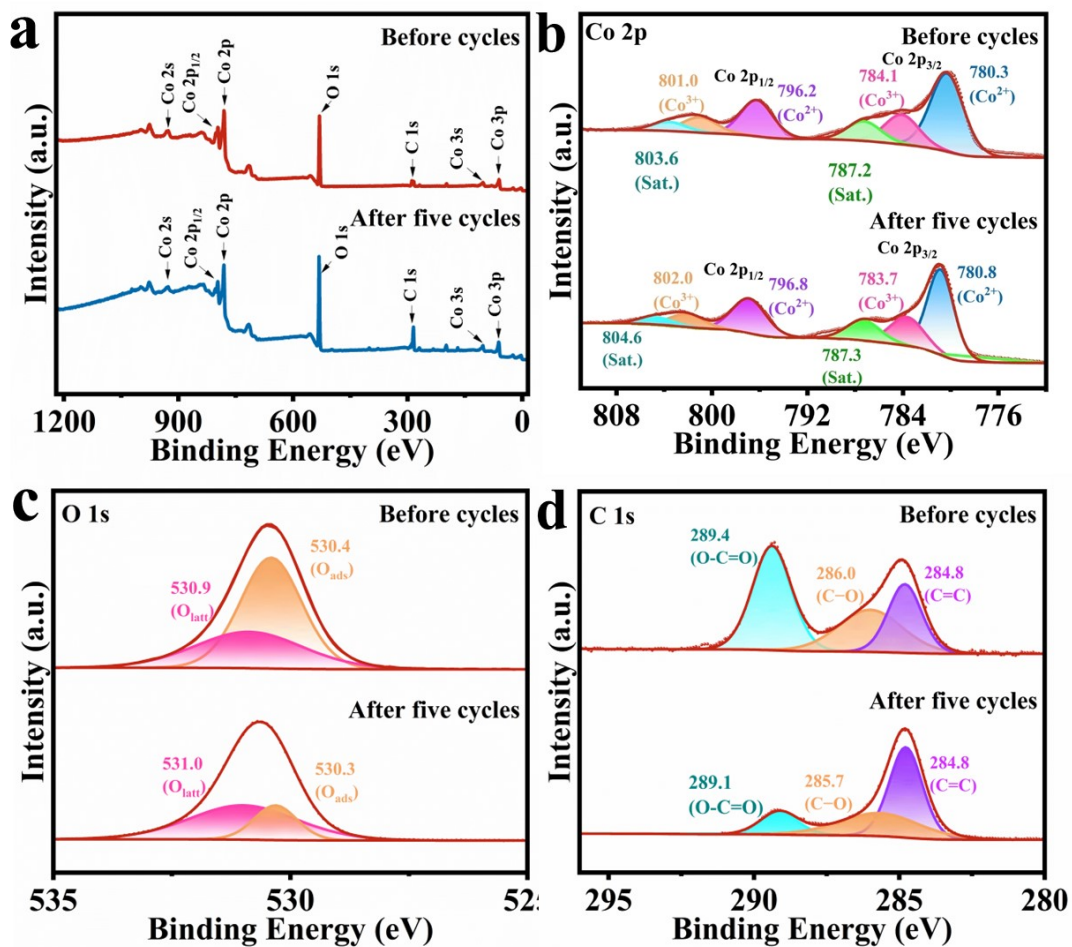

Fig. S9 XPS spectra of COC-1 after five cycles: **a** survey spectrum, **b** Co 2p, **c** O 1s, and **d** C 1s.

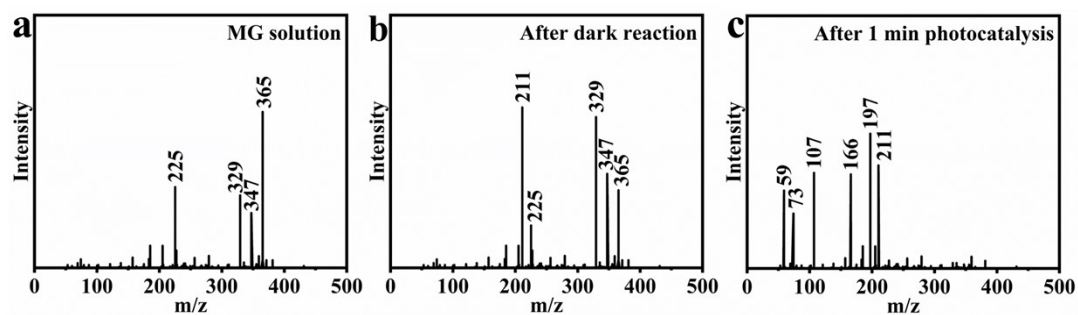

Fig. S10 HPLC-MS spectra of the solution samples during the MG degradation.

**Table S2** Identification of MG for COC-1 degradation intermediates by HPLC-MS

| Compound | Structure                                                                           | Formula              | m/z |
|----------|-------------------------------------------------------------------------------------|----------------------|-----|
|          | 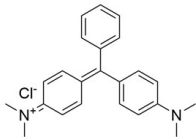   | $C_{23}H_{25}ClN_2$  | 365 |
| P1       |    | $C_{23}H_{25}N_2^+$  | 329 |
| P2       |    | $C_{23}H_{26}N_2$    | 330 |
| P3       |    | $C_{22}H_{24}N_2$    | 315 |
| P4       |   | $C_{21}H_{22}N_2$    | 301 |
| P5       |  | $C_{20}H_{20}N_2$    | 287 |
| P6       |  | $C_{19}H_{18}N_2$    | 273 |
| P7       |  | $C_{15}H_{15}NO$     | 215 |
| P8       |  | $C_{13}H_{11}NO$     | 197 |
| P9       |  | $C_{24}H_{28}N_2O^+$ | 347 |
| P10      |  | $C_{15}H_{15}NO$     | 225 |

|     |                                                                                   |                  |     |
|-----|-----------------------------------------------------------------------------------|------------------|-----|
| P11 | 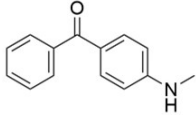 | $C_{14}H_{13}NO$ | 211 |
| P12 |  | $C_8H_6O_4$      | 166 |
| P13 |  | $C_6H_6O_2$      | 110 |
| P14 |  | $C_7H_6O$        | 107 |
| P15 |  | $C_2H_2O_3$      | 73  |
| P16 |  | $C_3H_5NO$       | 59  |

## Reference

1. F. Qiu, Y. Pan, L. Wang, H. Song, X. Liu, Y. Fan and S. Zhang, *Sep. Purif. Technol.*, 2024, **330**, 125139.
2. H. Salehzadeh, M.J. Rezaei, B. Shahmoradi, B. Nikkhoo, A. Allahweisi, A. Maleki, B. Rahimi, M. Rezaee, K. Nasiri and H.-J. Choi, *J. Environ. Manage.*, 2025, **386**, 125710.
3. L.R. Jabbar, S.H. Ammar and A.A. Amooey, *J. Water Process. Eng.*, 2025, **77**, 108545.
